# Supplementary material
Source: MDPI journal article supplement (https://www.mdpi.com/2673-7655/4/1/8)
Supplement: s1 [file s1]

## Supplementary Material

**Table S1.** Effect of cold plasma on symbiotic nitrogen fixation and plant growth related traits in different legume crops.

| Crop Type                                   | Gas/Air Type | CP Treatment Time | CP Responses on the Shoot, Root, and Nodule Parameters and SNF                                                                                                                                                                                                                                                                                                                                                                                                                                                                                                                                                                       | References |
|---------------------------------------------|--------------|-------------------|--------------------------------------------------------------------------------------------------------------------------------------------------------------------------------------------------------------------------------------------------------------------------------------------------------------------------------------------------------------------------------------------------------------------------------------------------------------------------------------------------------------------------------------------------------------------------------------------------------------------------------------|------------|
| <b>Indeterminate nodule-forming legumes</b> |              |                   |                                                                                                                                                                                                                                                                                                                                                                                                                                                                                                                                                                                                                                      |            |
| Red clover                                  | Air (200 Pa) | 5 or 7 mins       | <ul style="list-style-type: none"> <li>- The plants from CP-treated seeds showed the early formation of secondary roots and nodules</li> <li>- In 5-weeks-old seedlings from CP-treated seeds (5 and 7 mins), increased: <ul style="list-style-type: none"> <li>- root length</li> <li>- number of secondary roots</li> <li>- nine specific root exudates flavonoids</li> </ul> </li> <li>- In 5-weeks-old seedlings, CP treatment with 7 min increased: <ul style="list-style-type: none"> <li>- shoot weight</li> <li>- number of leaves</li> <li>- nodule number</li> <li>- total root exudates flavonoids</li> </ul> </li> </ul> | [22]       |
| Red clover                                  | Air (200 Pa) | 5 or 7 mins       | <ul style="list-style-type: none"> <li>- CP treatment effects depended on the seed color (yellow, purple, and brown)</li> <li>- In 7-day-old seedlings from CP-treated seeds (5 and 7 mins) increased: <ul style="list-style-type: none"> <li>- seedling height of yellow and brown seeds</li> <li>- seedling weight of brown seeds</li> </ul> </li> </ul>                                                                                                                                                                                                                                                                           | [24]       |

|            |              |        |                                                                                                                                                                                                                                                                                                                                                                                                                                                                                                                                                                                                                                                                                                                                                                                                                                     |      |
|------------|--------------|--------|-------------------------------------------------------------------------------------------------------------------------------------------------------------------------------------------------------------------------------------------------------------------------------------------------------------------------------------------------------------------------------------------------------------------------------------------------------------------------------------------------------------------------------------------------------------------------------------------------------------------------------------------------------------------------------------------------------------------------------------------------------------------------------------------------------------------------------------|------|
|            |              |        | <ul style="list-style-type: none"> <li>- In 5-weeks-old yellow seed seedlings from CP treated seeds (5 and 7 mins):               <ul style="list-style-type: none"> <li>- increased the root length.</li> <li>- did not increase the nodule number.</li> </ul> </li> <li>- In 5-weeks-old dark purple seed seedlings from CP treated seeds:               <ul style="list-style-type: none"> <li>- 5 min CP treatment increased the root length.</li> <li>- both 5- and 7-min CP treatments strongly increased the nodule number</li> </ul> </li> </ul>                                                                                                                                                                                                                                                                            |      |
| Red clover | Air (200 Pa) | 5 mins | <ul style="list-style-type: none"> <li>- In 1-2 tri-foliolate leaf stage, plants from cold plasma treated seeds increased:               <ul style="list-style-type: none"> <li>- Total root and shoot length by 25% and 57%, respectively.</li> <li>- Fresh root and shoot weight by 2.5 folds compared to the control</li> </ul> </li> <li>- 2<sup>nd</sup> year of vegetation, plants from cold plasma-treated seeds increased:               <ul style="list-style-type: none"> <li>- Root length by 13%</li> <li>- Fresh shoot weight by 25 folds</li> <li>- Nodules per plant by 38%</li> <li>- Root isoflavonoids; Daidzein and Formononetin content by 2 and 1.4-fold, respectively</li> </ul> </li> <li>- Enhanced root size was positively correlated with the nodule number per plant compared to the control</li> </ul> | [65] |

|                                           |                                                                                                                                                          |                                                                                                                                               |                                                                                                                                                                                                                                                                                                                                                                                                                                                                                                           |      |
|-------------------------------------------|----------------------------------------------------------------------------------------------------------------------------------------------------------|-----------------------------------------------------------------------------------------------------------------------------------------------|-----------------------------------------------------------------------------------------------------------------------------------------------------------------------------------------------------------------------------------------------------------------------------------------------------------------------------------------------------------------------------------------------------------------------------------------------------------------------------------------------------------|------|
| Pea                                       | Air<br>(atmospheric<br>pressure)                                                                                                                         | Experiment 1:<br>3 min for<br>different power<br>values (9-35 W)<br><br>Experiment 2:<br>different<br>timings (1-10<br>min) for 15 W<br>power | Experiment 1:<br>- In 15-day-old plants, 15 W, 21W, and 28<br>W CP treatments increased:<br>- Seedling height<br>- Seedling dry weight<br>- Chlorophyll content<br><br>Experiment 2:<br>- In 15-day-old plants, 15 W for 3 min CP<br>treatment increased:<br>- Seedling height<br>- Seedling dry weight<br>- Chlorophyll content                                                                                                                                                                          | [46] |
| <b>Determinate nodule-forming legumes</b> |                                                                                                                                                          |                                                                                                                                               |                                                                                                                                                                                                                                                                                                                                                                                                                                                                                                           |      |
| Soybean                                   | Air<br>(atmospheric<br>pressure)<br>with<br>alternate<br>supply of O <sub>2</sub><br>or N <sub>2</sub> (gas-<br>flow rate of 6<br>NL min <sup>-1</sup> ) | 2-3 mins                                                                                                                                      | - In 5-day-old plants, CP treatments<br>increased:<br>- Root growth<br>- <i>GmEXP1</i> gene expression in (1.7-<br>fold higher than the control) roots<br>in both N <sub>2</sub> and O <sub>2</sub> plasma<br>treatments<br>- In 15-day old plants, CP treatments<br>increased:<br>- Seedling fresh weight<br>- Seedling length<br>decreased:<br>- daidzein, genistein, and daidzin<br>isoflavonoid contents in roots<br>- Total glutathione content in roots<br>- <i>GmEXP1</i> gene expression in roots | [23] |

- 
- Lower root IAA (auxin) content compared to the control
  - tZR content was negatively correlated with auxin

- In 40-day-old plants, CP treatments increased:

- Aerial length (by 12%)
- Root length (by 1.2-fold)
- Total foliar area (by 25-30%)
- Total leaf chlorophyll content (by 5-10%)
- Average nodule number in primary roots (by 17 to 21-22%)
- Total nodule fresh weight (by 73%)
- Individual nodule fresh and dry weights (by 48% and 72% respectively)
- Nitrogenase activity in nodules (by 1.4-1.6-fold)
- Leghaemoglobin content (by 2 folds)
- Total nitrogen content per plant (by 25%)
- Nitrogen content in nodular tissues (by 2.1-3-fold)

decreased:

---

|         |                                                                                                                                 |                                                               |                                                                                                                                                                                                                                                                                                                                                                                                                                                                                                                                                                                                           |      |
|---------|---------------------------------------------------------------------------------------------------------------------------------|---------------------------------------------------------------|-----------------------------------------------------------------------------------------------------------------------------------------------------------------------------------------------------------------------------------------------------------------------------------------------------------------------------------------------------------------------------------------------------------------------------------------------------------------------------------------------------------------------------------------------------------------------------------------------------------|------|
|         |                                                                                                                                 |                                                               | - Nitrogen content in roots (by 28%)                                                                                                                                                                                                                                                                                                                                                                                                                                                                                                                                                                      |      |
| Soybean | Air (atmospheric pressure) with alternate supply of O <sub>2</sub> or N <sub>2</sub> (gas-flow rate of 6 NL min <sup>-1</sup> ) | 2-3 mins                                                      | <ul style="list-style-type: none"> <li>- At the total maturity stage CP (N<sub>2</sub>) treatment increased the: <ul style="list-style-type: none"> <li>- Plant height, stem diameter and root dry weight by 3%, 8% and 12%, respectively</li> <li>- Number of pods, seeds per plant, the total seed dry weight, and the 1000 seeds weight were improved by 8%, 4%, 11% and 2%, respectively</li> </ul> </li> </ul>                                                                                                                                                                                       | [66] |
| Soybean | Helium (150 Pa)                                                                                                                 | 15 sec for different power values (0, 60, 80, 100, and 120 W) | <ul style="list-style-type: none"> <li>- In 7-day-old seedlings, 80 W CP treatment increased: <ul style="list-style-type: none"> <li>- Shoot length and dry weight</li> <li>- Root length and dry weight</li> </ul> </li> </ul>                                                                                                                                                                                                                                                                                                                                                                           | [68] |
| Peanut  | Helium (150 Pa)                                                                                                                 | 15 sec for different power values (0, 60, 80, 100, and 120 W) | <ul style="list-style-type: none"> <li>- In 7-day-old seedlings: <ul style="list-style-type: none"> <li>- 120 W CP treatment increased the shoot and root dry weight</li> <li>- 60 W and 80 W CP treatments increased the root dry weight</li> </ul> </li> <li>- In the field (120 W CP treatment):</li> <li>- Fruiting stage plants increased: <ul style="list-style-type: none"> <li>- The leaf area</li> <li>- Leaf thickness</li> <li>- Leaf N concentration</li> <li>- Leaf chlorophyll content (SPAD)</li> <li>- Leaf dry weight</li> </ul> </li> <li>- Maturity stage plants increased:</li> </ul> | [67] |

- 
- Plant height
  - Stem diameter
  - Root dry weight
  - Branch number
  - Pod number
  - 100 pod weight
  - Final yield
-
